# Supplementary material
Source: HighWire-hosted journal article supplement (https://ajnr.org/content/suppl/2015/03/19/ajnr.A4261)
Supplement: 14-00790.pdf [file 14-00790.pdf]

**On-line Table 1: Selected surgical and endovascular series of nonsaccular proximal (defined as arising from the P1 or P2 segment) PCA aneurysms including treatment method and outcome**

| Author                                | No. of Cases                     | Presentation (No.)                                              | Technique (No.)                                                                                                     | Angiographic Outcome                                                           | Clinical Outcome (No.)                             |
|---------------------------------------|----------------------------------|-----------------------------------------------------------------|---------------------------------------------------------------------------------------------------------------------|--------------------------------------------------------------------------------|----------------------------------------------------|
| Drake and Peerless, 1997 <sup>1</sup> | 17 (16 P1, 1 P3)                 | aSAH (6), headache (6), mass effect (4), seizure (1)            | Proximal clip ligation (15), trapping (2)                                                                           | NA                                                                             | Excellent (13), <sup>a</sup> good (4) <sup>b</sup> |
| Ciceri et al, 2001 <sup>5</sup>       | 4 <sup>c</sup>                   | aSAH (2), nonruptured (2)                                       | Endovascular proximal coil occlusion (3), coiling (1)                                                               | PCA territory stroke (1)                                                       | GOS <sup>30</sup> 1 (4)                            |
| Hallacq et al, 2002 <sup>10</sup>     | 10 (10 P2)                       | Headache (7), aSAH (2), Gerstmann syndrome (1)                  | Proximal balloon or coil occlusion after test occlusion (9), conservative (1)                                       | No recanalization (9), NA (1)                                                  | Excellent (8), hemianopia (1), good (1)            |
| Chao et al, 2004 <sup>11</sup>        | 1 <sup>c</sup>                   | Mass effect (1)                                                 | Endovascular proximal coil occlusion after balloon test occlusion (1)                                               | NA                                                                             | Hemianopia (1)                                     |
| van Rooij et al, 2006 <sup>12</sup>   | 3 (2 P2, 1 P2/P3)                | aSAH (2), incidental (1)                                        | Proximal coil occlusion (3)                                                                                         | NA                                                                             | No deficit (1), GOS 5 (1), death (1)               |
| Cotroneo et al, 2007 <sup>13</sup>    | 3 (2 P2, 1 P2/P3)                | aSAH (3)                                                        | Proximal coil occlusion (2) after test occlusion (1)                                                                | No recanalization (3)                                                          | Excellent (1), hemianopia (2)                      |
| Roh et al, 2008 <sup>14</sup>         | 6 (4 P2, 1 P1, 1 P2/P3)          | aSAH (4), mass effect (2)                                       | Proximal coil occlusion (5), partial aneurysm coiling (1)                                                           | NA (5), residual filling (1)                                                   | Excellent (4), thalamus/midbrain infarct (2)       |
| Kocaeli et al, 2009 <sup>15</sup>     | 3 (2 P2, 1 P1/P2)                | Headache (2), stroke (1)                                        | Proximal coil occlusion (1) with adjunct revascularization (1), conservative (1)                                    | NA                                                                             | GOS 5 (2), GOS 4 (1)                               |
| Yonekawa et al, 2011 <sup>25</sup>    | 10 (2 P1/P2, 3 P2, 5 P2/P3)      | aSAH (2), nonruptured (2), not specified (6)                    | Proximal clip ligation (4), clipping, trapping, or aneurysmorrhaphy (6), adjunct revascularization (2) <sup>a</sup> | NA                                                                             | NA                                                 |
| Lee et al, 2011 <sup>26</sup>         | 1 <sup>c</sup>                   | aSAH (1)                                                        | Stent-assisted coiling (1)                                                                                          | Early rehemorrhage, PCA thrombosis, thalamus and occipital lobe infarction (1) | mRS <sup>30</sup> 3 (1)                            |
| Wang et al, 2012 <sup>27</sup>        | 9 (4 P2, 2 P2/P3, 2 P1, 1 P1/P2) | aSAH (4), ICH (3), stroke (1), headache (1)                     | Proximal coil occlusion (4), trapping (2), conservative (2), ventriculostomy (1)                                    | NA                                                                             | mRS 0 (4), mRS 1 (2), mRS 5 (2), death (1)         |
| Liu et al, 2011 <sup>24</sup>         | 11 (8 P2, 2 P2/P3, 1 P1/P2)      | aSAH (5), mass effect (3), headache (2), blurred vision (1)     | Proximal coil occlusion (11)                                                                                        | No recanalization (11)                                                         | GOS 5 (9), GOS 4 (1), hemianopia (1)               |
| Briganti et al, 2013 <sup>28</sup>    | 5 <sup>c</sup>                   | NA                                                              | Endoluminal reconstruction with the Silk <sup>e</sup> or PED (5)                                                    | NA                                                                             | NA                                                 |
| Pistocchi et al, 2012 <sup>8</sup>    | 1 <sup>c</sup>                   | Recurrence after endovascular treatment (not further specified) | Endoluminal reconstruction with the Silk device (1)                                                                 | Immediate total occlusion (1)                                                  | NA                                                 |
| Phillips et al, 2012 <sup>9</sup>     | 3 (2 P1/P3, 1 P2/P3)             | Incidental (2), mass effect (1)                                 | Endoluminal reconstruction with the PED (3)                                                                         | Aneurysm occlusion within 1 month (2), NA (1)                                  | No mRS change (3)                                  |
| Fischer et al, 2014 <sup>7</sup>      | 1 <sup>c</sup>                   | NA                                                              | Endoluminal reconstruction with the PED (1)                                                                         | NA                                                                             | NA                                                 |

**Note:**—NA indicates not applicable; ICH, intracerebral hemorrhage; GOS, Glasgow Outcome Score.

<sup>a</sup> "Excellent" indicates neurologically normal.

<sup>b</sup> "Good" indicates neurologic abnormalities detected on examination, but patient returned to full activities of normal living (eg, new hemianopsia).

<sup>c</sup> PCA segment not further specified.

<sup>d</sup> Two patients received in addition to their primary treatment an adjunct revascularization procedure (EC-IC bypass surgery).

<sup>e</sup> Balt Extrusion, Montmorency, France.

**On-line Table 2: Patient characteristics<sup>a</sup>**

|                                                                                | Patient 1        | Patient 2                       | Patient 3                                          | Patient 4                     | Patient 5                                             | Patient 6                  |
|--------------------------------------------------------------------------------|------------------|---------------------------------|----------------------------------------------------|-------------------------------|-------------------------------------------------------|----------------------------|
| Aneurysm location <sup>4</sup>                                                 | P1               | P1                              | P2                                                 | P2                            | P2                                                    | P2                         |
| Aneurysm size (maximum diameter, mean length of arterial segment involved)(mm) | 5/14             | 12/6                            | 31/9                                               | 23/7                          | 44/19                                                 | 20/6                       |
| Intra-aneurysmal thrombosis                                                    | No               | Minimal                         | Subtotal                                           | Subtotal                      | Subtotal                                              | Subtotal                   |
| No. of PEDs (dimension)                                                        | 1 (3.25 × 10 mm) | 1 (3.5 × 16 mm)                 | 1 (3 × 35 mm)                                      | 2 (2.5 × 20 mm; 2.75 × 10 mm) | 1 (3 × 35 mm)                                         | 1 (2.5 × 20 mm)            |
| Intra- and postprocedural complications                                        | No               | No                              | Hemorrhagic vessel perforation                     | No                            | Asymptomatic parent vessel occlusion                  | No                         |
| Index symptom                                                                  | Subacute aSAH    | Perforator stroke (hemiparesis) | Mass effect (dizziness; sensorimotor hemisindrome) | Mass effect (CN III palsy)    | Mass effect (CN III palsy; sensorimotor hemisindrome) | Mass effect (CN III palsy) |
| Resolution of index symptoms                                                   | Yes              | Yes                             | No                                                 | Yes                           | No                                                    | Yes                        |
| 6-Month angiographic obliteration                                              | Yes              | Yes                             | Yes                                                | Yes                           | Yes <sup>b</sup>                                      | No                         |
| 12-Month angiographic obliteration                                             | Yes              | Yes                             | Yes                                                | Yes                           | Yes                                                   | Yes                        |
| Follow-up (days)                                                               | 543              | 540                             | 710                                                | 620                           | 540                                                   | 725                        |

<sup>a</sup> Six consecutive cases with nonsaccular P1 or P2 segment aneurysms were treated with the PED by our team between January 2009 and June 2013 and were subject to retrospective analysis.

<sup>b</sup> Asymptomatic parent vessel occlusion on 6-month follow-up angiography.
